# Supplementary material for: Resistance of Pastes from Carbonated, Low-Lime Calcium Silica Cements to External Sulfate Attack
Source: MDPI journal article supplement (doi:10.3390/ma16124276), 2023-06-09
Supplement: s1 [file s1]

**Table S1.** LOI and the amount of total alkalis of the cements

|                  | Cement #1 | Cement #2 | Cement #3 | Cement #4 |
|------------------|-----------|-----------|-----------|-----------|
| LOI, %           | 0.72      | 1.61      | 0.71      | 0.79      |
| Total alkalis, % | 0.18      | 0.45      | 1.61      | 0.92      |

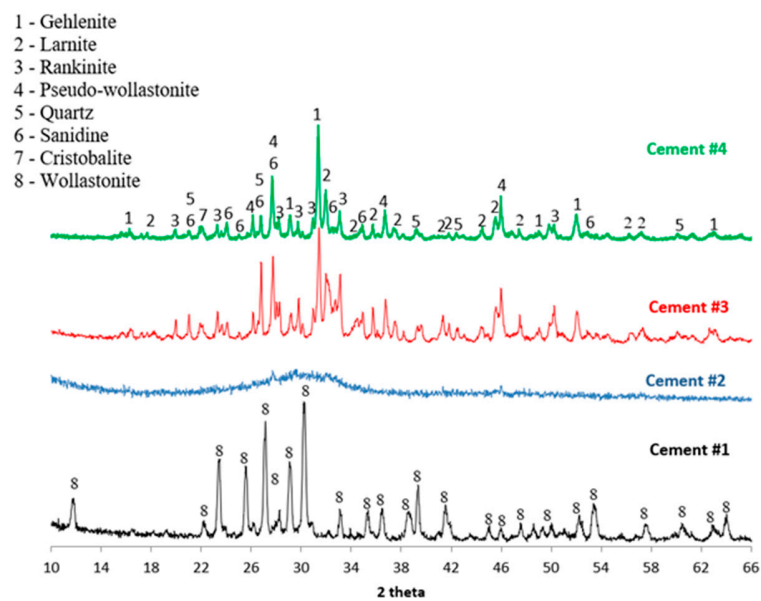

**Figure S1.** XRD patterns of the cements

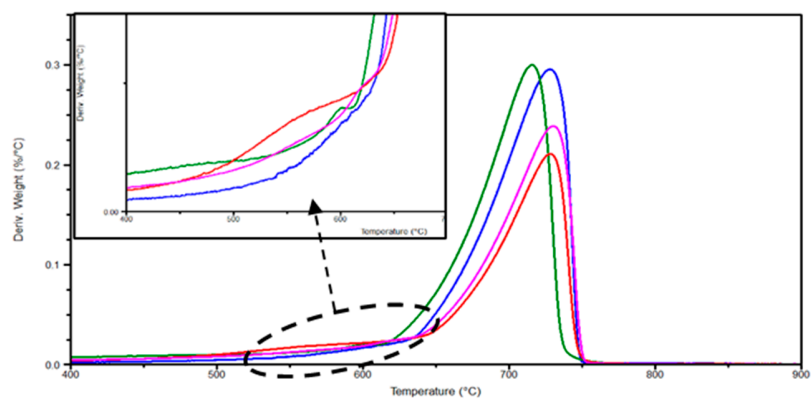

**Figure S2.** DTGA curves of the carbonated paste samples; left upper corner image contains the magnified view of the hump in the 450-630°C temperature range.

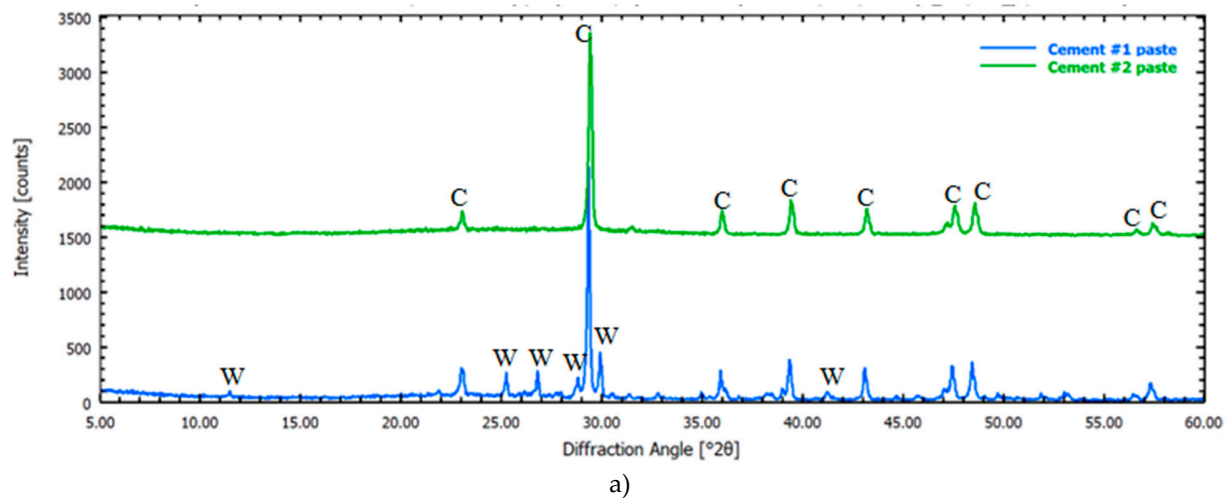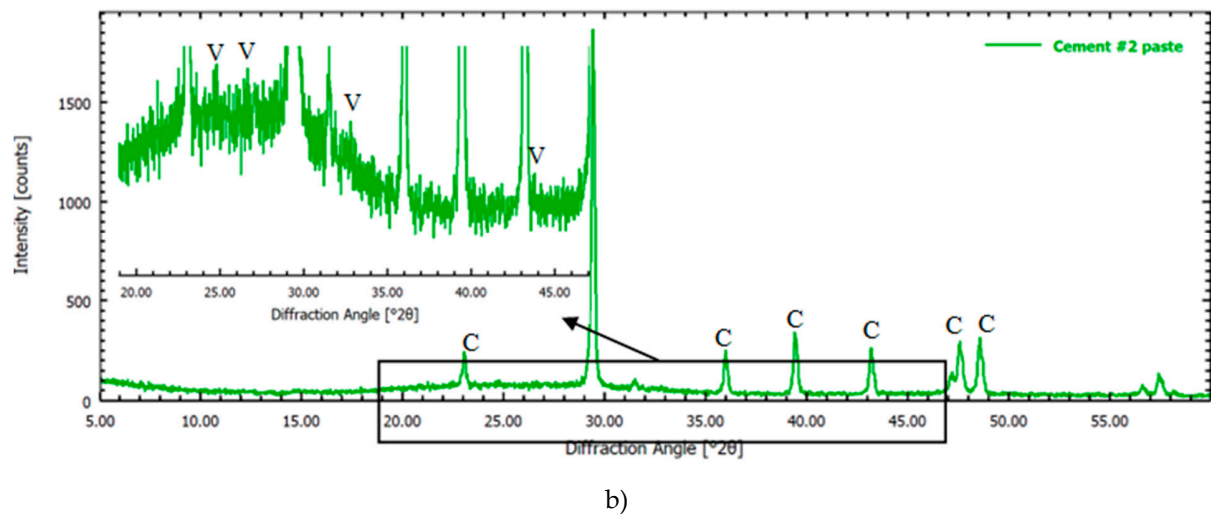

**Figure S3.** XRD patterns of carbonated cement #1 and #2 pastes: a) both cement pastes with all the main peaks labeled; b) XRD pattern of cement #2 paste with magnified peaks of vaterite (key: C - calcite, V - vaterite, W - wollastonite)

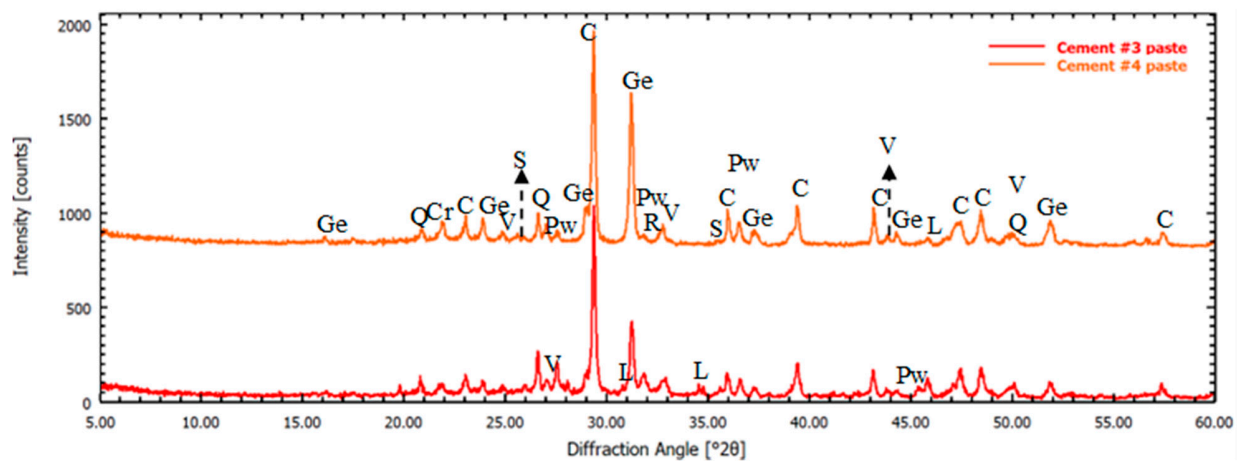

**Figure S4.** XRD patterns of carbonated cement #3 and #4 pastes (key: C – calcite, Cr – cristobalite, Ge – gehlenite, L – larnite, Pw – pseudo-wollastonite, Q – quartz, R – rankinite, S – sanidine, V – vaterite)

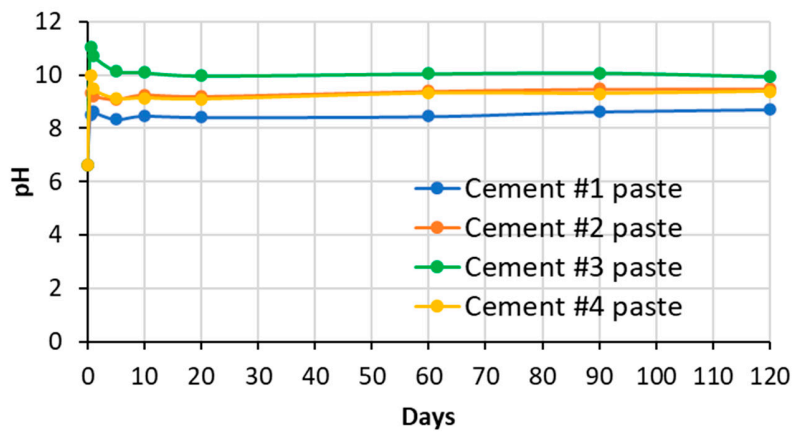

a)

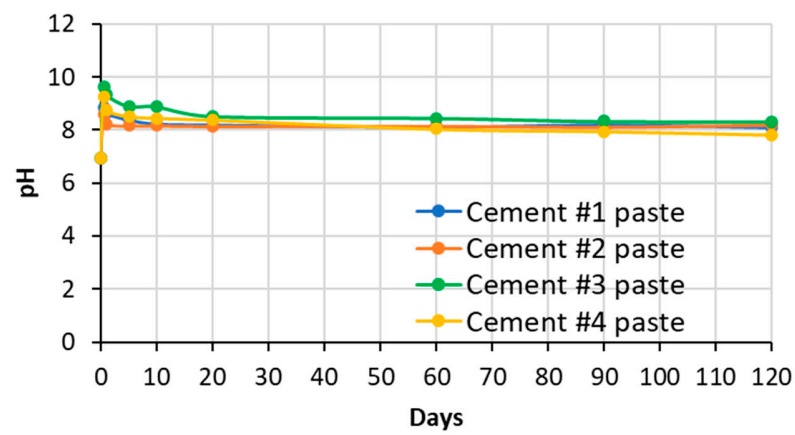

b)

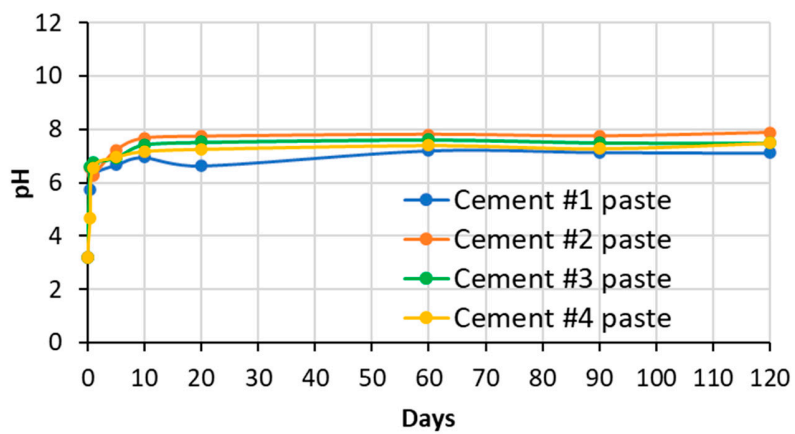

c)

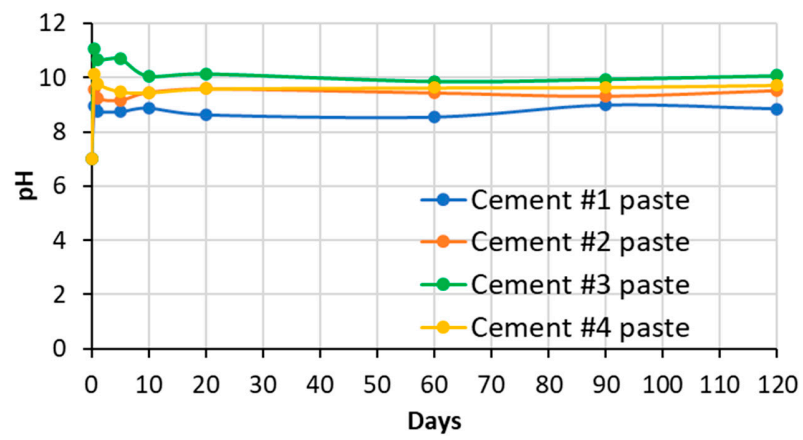

d)

**Figure S5.** Change of pH values of sulfate solutions a) sodium sulfate, b) magnesium sulfate c) aluminum sulfate solution d) de-ionized water

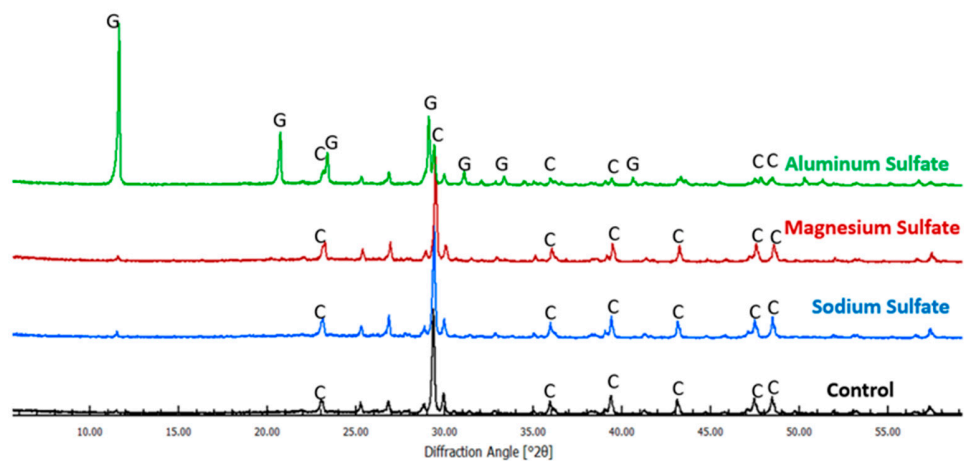

**Figure S6.** XRD patterns of the cement #1 paste samples after 120-days of exposure to sodium, magnesium and aluminum sulfate solutions (key: C – calcite, G – gypsum)



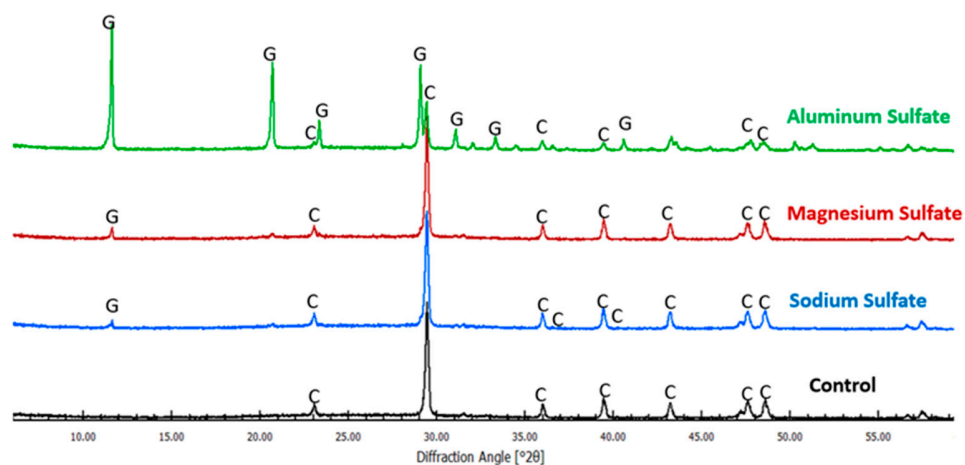

**Figure S7.** XRD patterns of the cement #2 paste samples after 120-days of exposure to sodium, magnesium and aluminum sulfate solutions (key: C – calcite, G – gypsum)

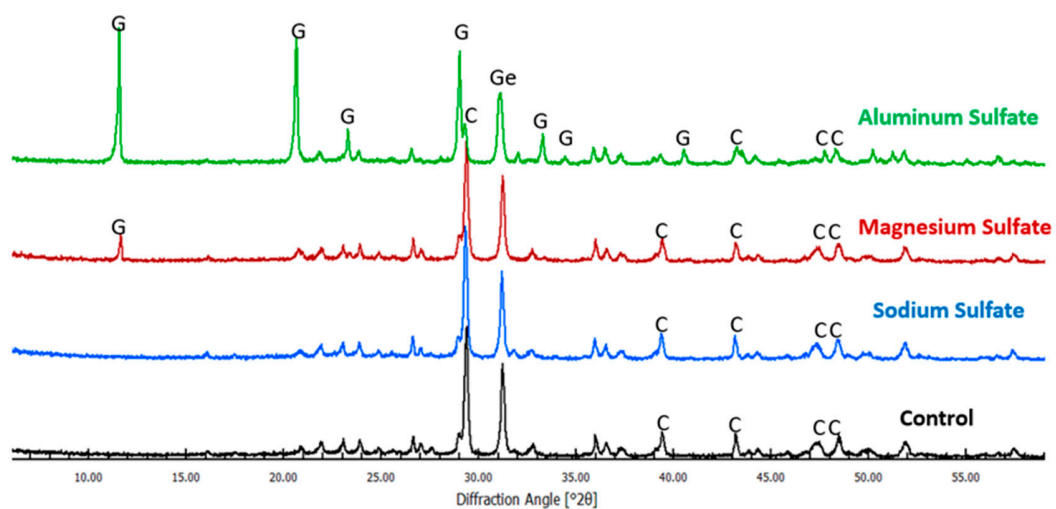

**Figure S8.** XRD patterns of the cement #4 paste samples after 120-days of exposure to sodium, magnesium and aluminum sulfate solutions (key: C – calcite, G – gypsum)

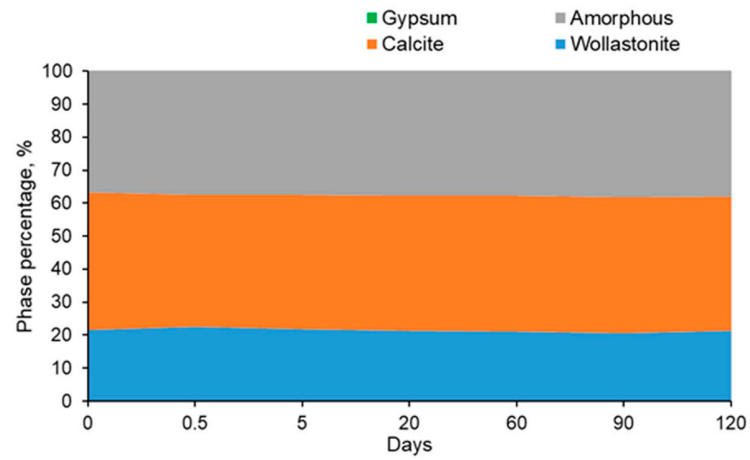

a) After exposure to sodium sulfate solution

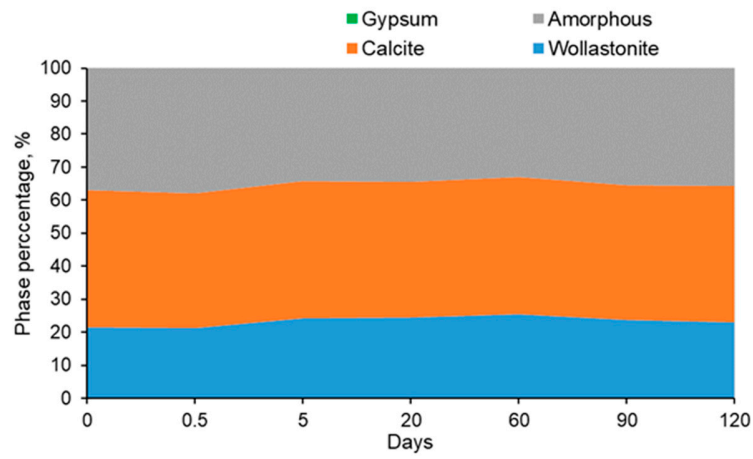

b) After exposure to magnesium sulfate solution

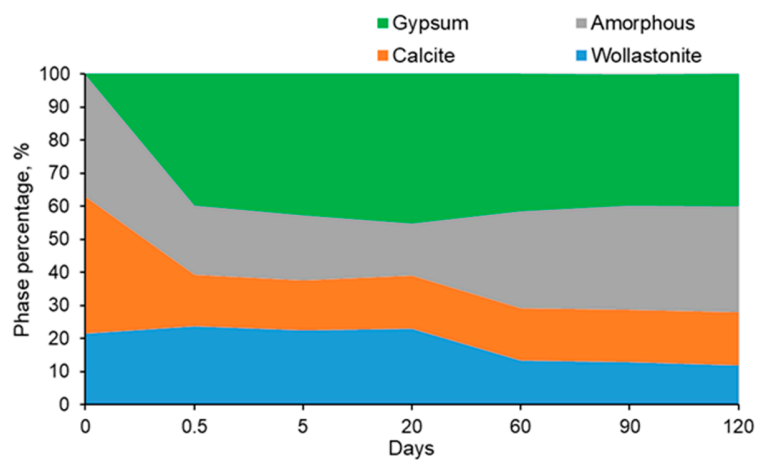

c) After exposure to aluminum sulfate solution

**Figure S9.** The results of the QXRD analysis of paste samples from cement #1 after sulfate exposure test

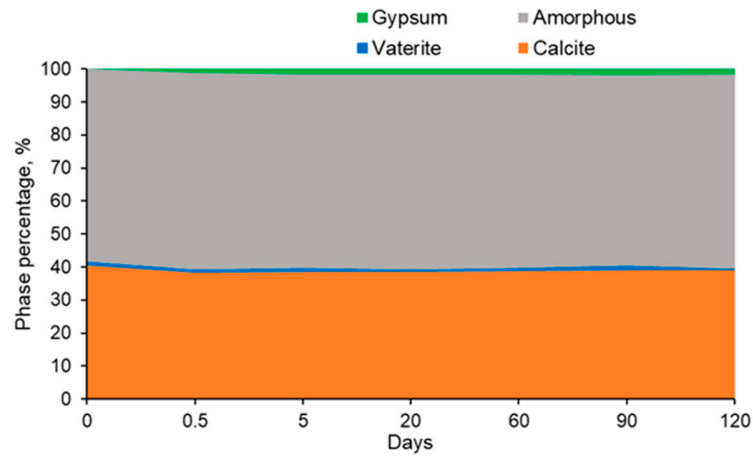

a) After exposure to sodium sulfate solution

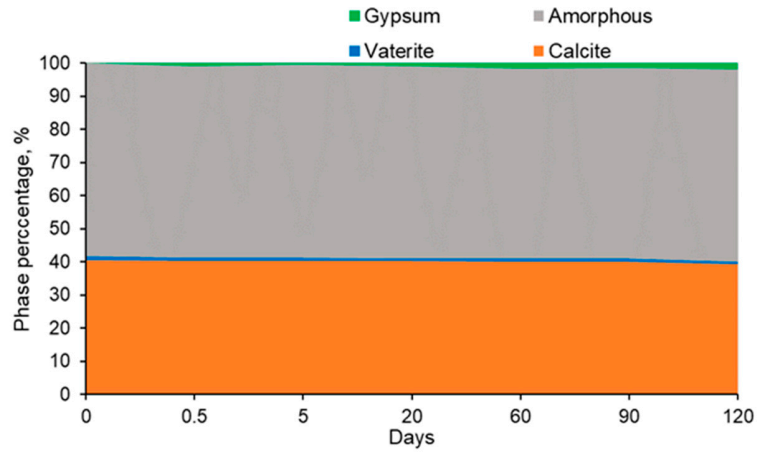

b) After exposure to magnesium sulfate solution

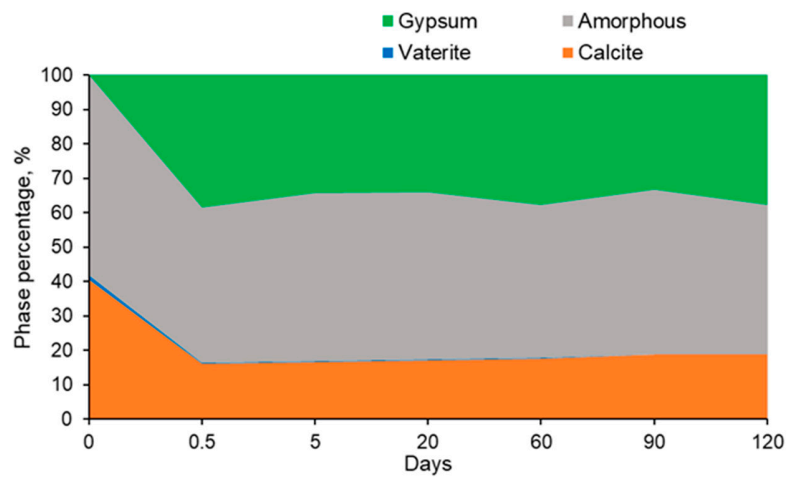

c) After exposure to aluminum sulfate solution

**Figure S10.** The results of the QXRD analysis of paste samples from cement #2 after sulfate exposure test

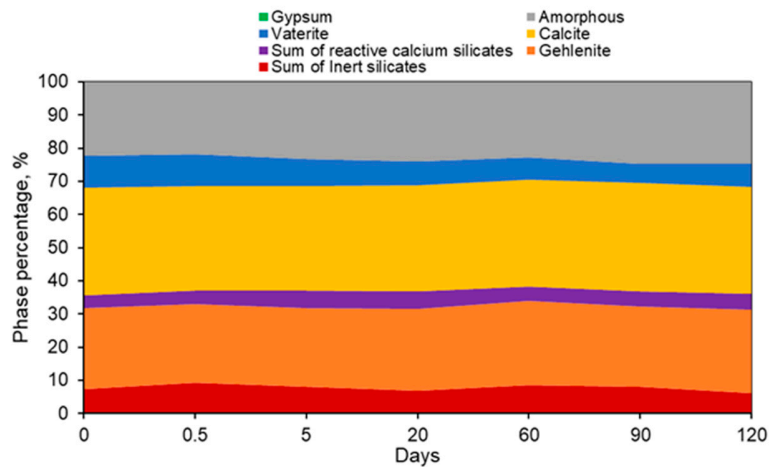

a) After exposure to sodium sulfate solution

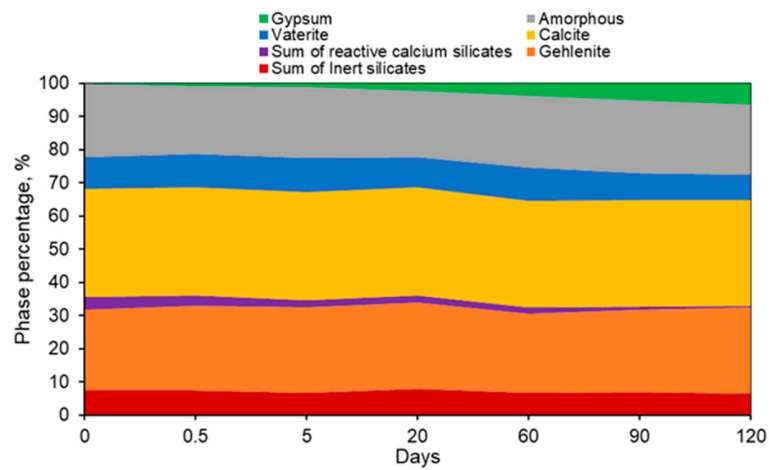

b) After exposure to magnesium sulfate solution

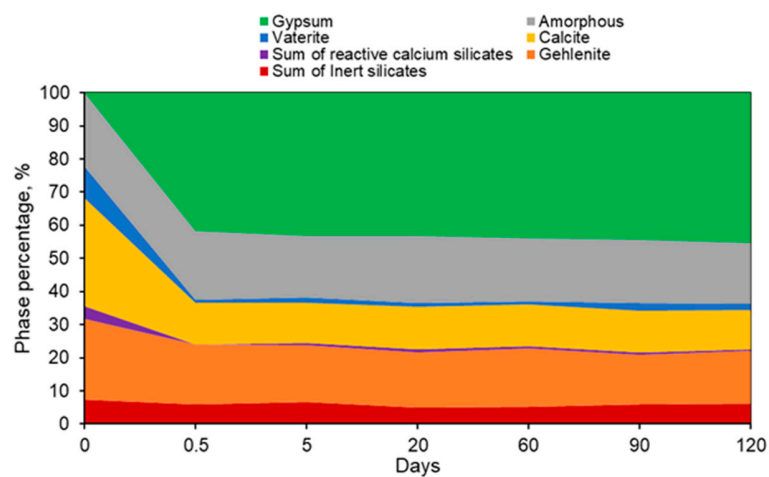

c) After exposure to aluminum sulfate solution

**Figure S11.** The results of the QXRD analysis of paste samples from cement #4 after sulfate exposure test

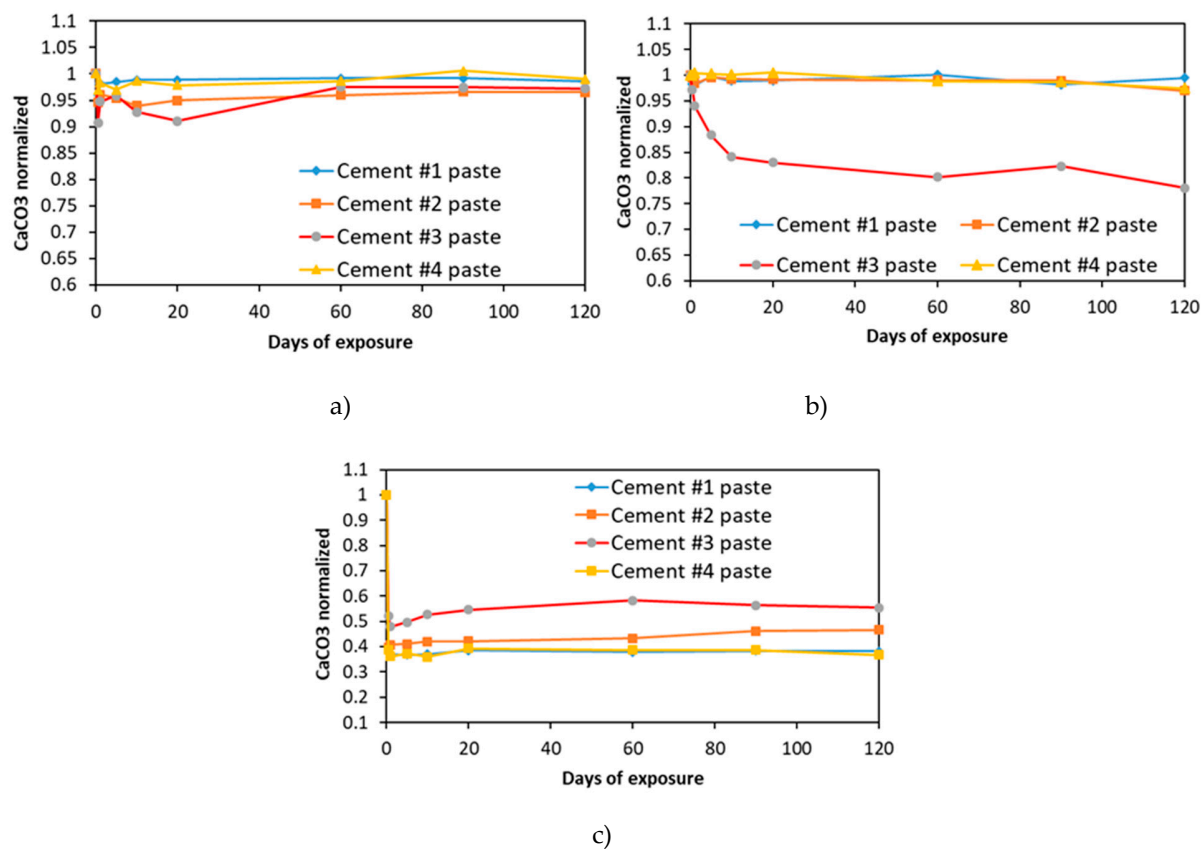

**Figure S12.** Change of calcium carbonate phase during exposure to a) sodium sulfate, b) magnesium sulfate c) aluminum sulfate solution

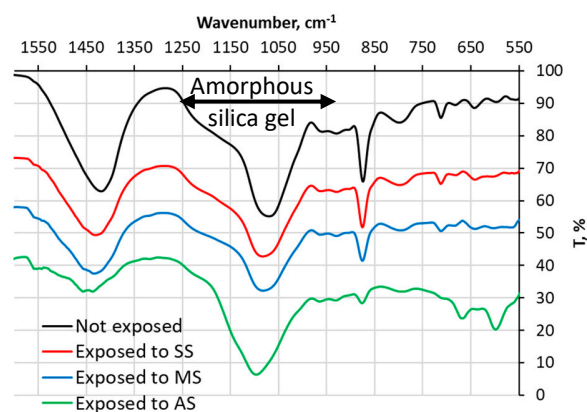

a)

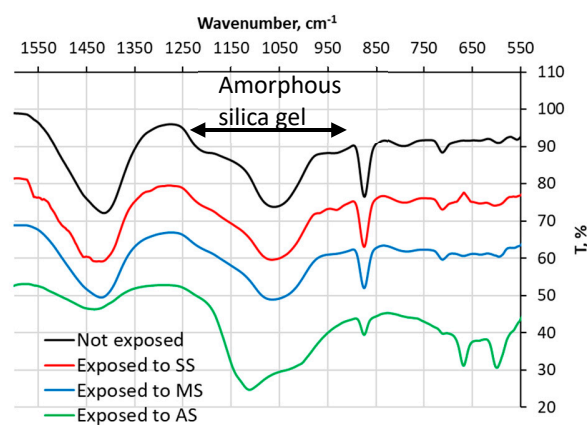

b)

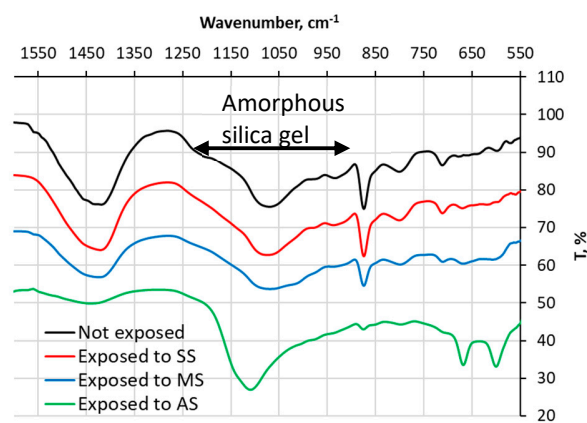

c)

**Figure S13.** FT-IR spectra of the paste samples after 120-day exposure to the sulfate solutions: (a) – cement #1 paste, (b) – cement #2 and (c) – cement #4 paste samples. Key: SS – sodium sulfate, MS – magnesium sulfate, AS – aluminum sulfate
